# Supplementary material for: Crucial role of the ligand of silyl Lewis acid in the Mukaiyama aldol reactionElectronic supplementary information (ESI) available: experimental section. See http://www.rsc.org/suppdata/cc/b2/b203838b/
Source: Royal Society of Chemistry journal article supplement (doi:10.1039/b203838b), 2002-06-19
Supplement: b203838b.doc [file b203838b.doc]

**Supporting data**

**Crucial role of the ligand of silyl Lewis acid in the Mukaiyama aldol reaction**

Kazuaki Ishihara, Yukihiro Hiraiwa and Hisashi Yamamoto*

*Graduate School of Engineering, Nagoya University, SORST, Japan Science and Technology Corporation (JST), Furo-cho, Chikusa, Nagoya 464-8603, Japan. Fax : (+81)52-789-3222; E-mail:* [*yamamoto@cc.nagoya-u.ac.jp*](mailto:yamamoto@cc.nagoya-u.ac.jp)

**General.** Analytical gas–liquid phase chromatography (GC) was performed on a Shimadzu Model GC-17A Ver. 3 instrument with a flame-ionization detector and a capillary column of TC-1 (100% dimethylpolysiloxane, 0.25 mm x 30 m, GL Sciences Inc.) using helium as carrier gas (116.0 kPa). Measurement conditions: Injection temp. 150 °C; column temp. 70 °C for 5 min, +10 °C/min for 18 min, and 250 °C for 7 min.

**Preparation of Me3SiNTf2.1** Me3SiNTf2 was prepared from Me3SiCl (1.2 equiv) and AgNTf2 (1 equiv) in dichloromethane and purified by distillation (80–84 °C, 7 torr).

**Preparation of *t*-BuMe2SiNTf2.2** *t*-BuMe2SiNTf2, which was prepared from *t*-BuMe2SiCl (1.2 equiv) and AgNTf2 (1 equiv) in Et2O, was used as a catalyst for the Mukaiyama aldol reactions without isolation.

**Preparation of 1-(thexyldimethylsiloxy)-1-(*p*-tolyl)ethylene (13).** Silyl enol ether **13** was prepared from thexyldimethylsilyltrifluoromethanesulfonate and a lithium enolate derived from 4-methylacetophenone.

To a solution of benzaldehyde (102 L, 1.0 mmol) in dry Et2O (50 mL) was added Me3SiNTf2 (353 mg, 1.0 mmol) at –100 °C. After 1 min, *tert*-butyldimethylsilyl enol ether **9** (281 mg, 1.2 mmol) was added dropwise at the same temperature. After stirring for 0.5 h, pyridine (200 L) and saturated aqueous NaHCO3 (20 mL) were added. The mixture was allowed to warm up to room temperature and extracted with Et2O twice. The combined organic extracts were dried over Na2SO4, concentrated under reduced pressure, and the residue was purified by column chromatography on silica gel (eluent: hexane:EtOAc=10:1) to give *tert*-butyldimethylsilyl ether **10** in >99% yield. The corresponding trimethylsilyl ether **12** was not formed in a detectable amount by 1H NMR and GC analyses.

**3-*tert*-Butyldimethylsiloxy-1,3-diphenylpropan-1-one (10):3** TLC (hexane–EtOAc=4:1) *R*f=0.74, GC *t*R=20.5 min; 1H NMR (300 MHz)  –0.19 (s, 3H), –0.09 (s, 3H), 0.74 (s, 9H), 2.95 (dd, *J*=3.9, 15.3 Hz, 1H), 3.58 (dd, *J*=9.0, 15.3 Hz, 1H), 5.36 (dd, *J*=3.9, 9.0 Hz, 1H), 7.22–7.59 (m, 8H), 7.97 (d, *J*=7.2 Hz, 2H).

To a solution of benzaldehyde (102 L, 1.0 mmol) in dry Et2O (50 mL) was added *t*-BuMe2SiNTf2 (1.0 mmol) at –100 °C. After 1 min, trimethylsilyl enol ether **11** (246 L, 1.2 mmol) was added dropwise at the same temperature. After stirring for 0.5 h, pyridine (200 L) and saturated aqueous NaHCO3 (20 mL) were added. The mixture was allowed to warm up to room temperature and extracted with Et2O twice. The combined organic extracts were dried over Na2SO4, concentrated under reduced pressure, and the residue was purified by column chromatography on silica gel (eluent: hexane:EtOAc=10:1) to give trimethylsilyl ether **12** in 62% yield. Other compounds were benzaldehyde and acetophenone. The corresponding *tert*-butyldimethylsilyl ether **10** was not formed in a detectable amount by 1H NMR and GC analyses.

**3-Trimethylsiloxy-1,3-diphenylpropan-1-one (10):4** TLC (hexane–EtOAc=9:1) *R*f=0.46; GC *t*R=17.8 min; 1H NMR (300 MHz)  –0.04 (s, 9H), 3.02 (dd, *J*=3.9, 15.6 Hz, 1H), 3.57 (dd, *J*=8.7, 15.6 Hz, 1H), 5.38 (dd, *J*=3.6, 8.7 Hz, 1H), 7.23–7.58 (m, 8H), 7.96 (d, *J*=6.9 Hz, 2H).

To a solution of **9** (421 mg, 1.8 mmol) and thexyldimethylsilyl enol ether derived from *p*-tolualdehyde (497 mg, 1.8 mmol) in dry Et2O (6 mL) was added Me3SiNTf2 (10.6 mg, 0.03 mmol) at –78 °C. After 1 min, benzaldehyde (305 L, 3.0 mmol) was added dropwise at the same temperature. After stirring for 0.25 h, pyridine (200 L) and saturated aqueous NaHCO3 (20 mL) were added. The mixture was allowed to warm up to room temperature and extracted with Et2O twice. The combined organic extracts were dried over Na2SO4, concentrated under reduced pressure, and the residue was purified by column chromatography on silica gel (eluent: hexane:EtOAc=10:1) to give a mixtutre of aldol products **10**, **14**, **15** and **16** in >99% yield. It was determined that its molar ratio was 27:27:24:22 by 1H NMR and GC analyses of crude products.

**3-Thexyldimethylsiloxy-1-(*p*-tolyl)-3-phenylpropan-1-one (14):**  TLC (hexane-EtOAc, 4:1) *R*f=0.64; GC *t*R=22.8 min; IR (film) 2959, 1684, 1607, 1254, 1089, 1071, 939, 831, 810, 777 cm–1; 1H NMR (300 MHz)  –0.20 (s, 3H), –0.01 (s, 3H), 0.71 (s, 6H), 0.771 (d, *J*=6.9 Hz, 3H), 0.776 (d, J=6.9 Hz), 1.51 (septet, *J*=6.9 Hz, 1H), 2.41 (s, 3H), 2.92 (dd, *J*=3.9, 15.0 Hz, 1H), 3.55 (dd, *J*=8.4, 15.0 Hz, 1H), 5.35 (dd, *J*=3.9, 8.4 Hz, 1H), 7.23–7.42 (m, 7H), 7.86 (d, *J*=8.1 Hz, 2H). Anal. Calcd for C24H34O2Si: C, 75.34; H, 8.96. Found: C, 75.32; H, 8.99.

**3-Thexyldimethylsiloxy-1,3-diphenylpropan-1-one (15):5** TLC (hexane-EtOAc, 4:1) *R*f=0.72; GC *t*R=22.5 min; 1H NMR (300 MHz)  –0.20 (s, 3H), –0.01 (s, 3H), 0.71 (s, 6H), 0.77 (d, *J*=6.9 Hz, 2H), 0.78 (d, *J*=6.9 Hz, 3H), 1.51 (septet, *J*=6.9 Hz, 1H), 2.95 (dd, *J*=4.2, 15.0 Hz, 1H), 3.58 (dd, *J*=9.0, 15.0 Hz, 1H), 5.36 (dd, *J*=4.2, 9.0 Hz, 1H), 7.21–7.59 (m, 8H), 7.96 (d, *J*=7.2 Hz, 2H).

**3-*tert*-Butyldimethylsiloxy-1-(*p*-tolyl)-3-phenylpropan-1-one (16)**: TLC (hexane-EtOAc, 4:1) *R*f=0.74; GC *t*R=20.9 min; IR (film) 2955, 1686, 1607, 1256, 1092, 1071, 939, 835, 808, 779 cm–1; 1H NMR (300 MHz)  –0.18 (s, 3H), –0.09 (s, 3H), 0.75 (s, 9H), 2.41 (s, 3H), 2.92 (dd, *J*=3.9, 15.3 Hz, 1H), 3.55 (dd, *J*=8.7, 15.3 Hz, 1H), 5.35 (dd, *J*=3.9, 8.7 Hz, 1H), 7.23–7.43 (m, 7H), 7.87 (d, *J*=8.1 Hz, 2H). Anal. Calcd for C22H30O2Si: C, 74.53; H, 8.53. Found: C, 74.67; H, 8.52.

# Table 1

The aldol reactions indicated in Table 1 were carried out in the similar manner to the above experiments. *Syn/anti* ratio of aldol products was determined by 1H NMR analysis.6

The aldol reactions indicated in eq. 4 were carried out in the similar manner to the above experiments.

To a solution of allyl(*tert*-butyl)dimethylsilane7 (188 mg, 1.2 mmol) in dry Et2O (25 mL) and dichloromethane (25 mL) was added Me3SiNTf2 (353 mg, 1.0 mmol) at –78 °C. After 1 min, benzaldehyde (102 L, 1.0 mmol) was added dropwise at the same temperature. After stirring for 40 min, pyridine (200 L) and saturated aqueous NaHCO3 (20 mL) were added. The mixture was allowed to warm up to room temperature and extracted with Et2O twice. The combined organic extracts were dried over Na2SO4, concentrated under reduced pressure, and the residue was purified by column chromatography on silica gel (eluent: hexane:EtOAc=20:1) to give a mixtutre of silyl ethers **22** and **23** in >99% yield. It was determined that its molar ratio was 3:97 by 1H NMR and GC analyses of crude products.

**4-Trimethylsiloxy-4-phenyl-1-butene (22):8** TLC (hexane–EtOAc, 4:1) *R*f=0.79; GC *t*R=9.0 min; 1H NMR (CDCl3) 0.037 (s, 9H), 2.35–2.53 (m, 2H), 4.66 (dd, *J*=5.7, 7.8 Hz, 1H), 5.00–5.06 (m, 2H), 5.70–5.84 (m, 1H), 7.22–7.32 (m, 5H).

**4-*tert*-Butyldimethylsiloxy-4-phenyl-1-butene (23):9** TLC (hexane–EtOAc, 4:1) *R*f=0.84; GC *t*R=12.3 min; 1H NMR (CDCl3) –0.14 (s, 3H), 0.022 (s, 3H), 0.88 (s, 9H), 2.33–2.51 (m, 2H), 4.68 (dd, *J*=5.1, 6.9 Hz, 1H), 4.98–5.04 (m, 2H), 5.71–5.85 (m, 1H), 7.20–7.31 (m, 5H).

# References

1. Vij, A.; Zheng, Y. Y.; Kirchmeier, R. L.; Shreeve, J. M. *Inorg. Chem.* **1994**, *33*, 3281.
2. Simchen, G.; Jonas, S. *J. prakt Chem.* **1998**, *340*, 506.
3. Ukaji, Y.; Kanda, H.; Yamamoto, K.; Fujisawa, T. *Chem. Lett.* **1990**, 597.
4. Torii, S.; Inokuchi, T.; Takagishi, S.; Horike, H.; Kuroda, H.; Uneyama, K. *Bull. Chem. Soc. Jpn.* **1987**, *60*, 2173.
5. Antonsen, O.; Benneche, T.; Gundersen, L. L.; Undheim, K. *Acta Chem. Scand.* **1992**, *46*, 172.
6. Ishihara, K.; Kondo, S.; Yamamoto, H. *J. Org. Chem.* **2000**. *65*, 9126.
7. Ogoshi, S.; Yoshida, W.; Ohe, K.; Murai, S. *Organometallics* **1993**, *12*, 578.
8. Davis, A. P.; Jaspars, M. *J. Chem. Soc., Perkin Trans. 1* **1992**, 2111.
9. Aprile, C.; Gruttadauria, M.; Lo Meo, P.; Riela, S.; Noto, R. *Heterocycles* **2002**, *57*, 293.
